1 **Predictors of hospitalisation and death due to SARS-CoV-2 infection in**  
2 **Finland: a population-based register study with implications to**  
3 **vaccinations**

4

5 Heini Salo<sup>1\*</sup>, Toni Lehtonen<sup>1</sup>, Kari Auranen<sup>1,2</sup>, Ulrike Baum<sup>1</sup>, Tuija Leino<sup>1</sup>

- 6 1. Infectious Disease Control and Vaccinations Unit, Department of Health Security, Finnish  
7 Institute for Health and Welfare (THL), Helsinki, Finland  
8 2. The Center of Statistics, University of Turku, Turku, Finland

9

10 \*Corresponding author

11 E-mail address: [heini.salo@thl.fi](mailto:heini.salo@thl.fi)

12

13 Article type: Research Article

14 Content: Original research

15 Keywords: SARS-CoV-2, COVID-19, risk factors, elderly, chronically ill

16

17

18 **Abstract**

19 **Introduction.** The aim of this study was to investigate how age and underlying medical conditions  
20 affect the risk of severe outcomes following SARS-CoV-2 infection and how they should be  
21 weighed while prioritising vaccinations against COVID-19.

22 **Methods.** This population-based register study includes all SARS-CoV-2 PCR-test-positive cases  
23 until 24 Feb 2021, based on the Finnish National Infectious Diseases Register. The cases were  
24 linked to other registers to identify presence of comorbidities and severe outcomes  
25 (hospitalisation, intensive care treatment, death). The odds of severe outcomes were compared in  
26 those with and without the pre-specified comorbidities using logistic regression. Furthermore,  
27 population-based rates were compared between those with a given comorbidity and those  
28 without any of the specified comorbidities using negative binomial regression.

29 **Results.** Age and various comorbidities were found to be predictors of severe COVID-19.  
30 Compared to 60–69-year-olds, the odds ratio (OR) of death was 7.1 for 70–79-year-olds, 26.7 for  
31 80–89-year-olds, and 55.8 for ≥90-year-olds. Among the 20–69-year-olds, chronic renal disease  
32 (OR 9.4), malignant neoplasms (5.8), hematologic malignancy (5.6), chronic pulmonary disease  
33 (5.4), and cerebral palsy or other paralytic syndromes (4.6) were strongly associated with COVID-  
34 19 mortality; severe disorders of the immune system (8.0), organ or stem cell transplant (7.2),  
35 chronic renal disease (6.7), and diseases of myoneural junction and muscle (5.5) were strongly  
36 associated with COVID-19 hospitalisation. Type 2 diabetes and asthma, two very common  
37 comorbidities, were associated with all three outcomes, with ORs from 2.1 to 4.3. The population-  
38 based rate of SARS-CoV-2 infection decreased with age. Taking the 60–69-year-olds as reference,

39 the rate ratio was highest (3.0) for 20–29-year-olds but <1 for 70–79-year-olds and 80–89-year-  
40 olds.

41 **Conclusion.** Comorbidities predispose for severe COVID-19 among younger ages. In vaccine  
42 prioritisation both the risk of infection and the risk of severe outcomes, if infected, should be  
43 combined.

#### 44 **Introduction**

45 Already during summer 2020, the first listings of predisposing conditions for severe COVID-19  
46 were published to inform the public on the need to shield the most vulnerable.[1-6] Furthermore,  
47 while efficacy studies of COVID-19 vaccines were still being carried out, more detailed research  
48 was published on predisposing factors for severe infection outcomes leading to hospitalisation  
49 [7,8], intensive care [7,9,10], or death [7,8,11-14]. The implications from these studies have been  
50 valuable in planning how to allocate the limited number of vaccine doses optimally to prevent  
51 hospitalisations, need to intensive care and deaths.[15] For example, one of the questions was  
52 whether the elderly or individuals with certain background illnesses should be prioritised for  
53 COVID-19 vaccination.[15] Along with the other European Union countries, Finland joined a  
54 common procurement system and subsequently commenced COVID-19 vaccinations in late  
55 December 2020.

56 We carried out a country-level analysis of factors predisposing for severe COVID-19 outcomes,  
57 based on the possibility to link information across several national health care registers using the  
58 unique personal identifier. The specific aim of our study was to investigate how age and presence  
59 of underlying medical conditions affect the risk of severe COVID-19 outcomes and how age and  
60 medical conditions should be weighed against each other while prioritising vaccination. We thus

61 concentrated on assessing the risk of hospitalisation, intensive care treatment and death in those  
62 with SARS-CoV-2 infection, with specific attention to the elderly and persons with certain chronic  
63 illnesses and those taking potentially predisposing medications. We here report the results with a  
64 particular focus on how these data were used to support effective COVID-19 vaccination  
65 intervention in Finland.

## 66 **Material and Methods**

### 67 *Data sources and case definitions*

68 The total population of Finland in 2019 was 5.5 million, 51% of which were women. Age- and  
69 gender-specific population sizes were obtained from the Finnish Population Information System, a  
70 computerised national database which registers individual-based information for all Finnish  
71 residents, including name, gender, personal identity code, address, date of birth, and death. The  
72 personal identity code remains unchanged throughout the lifetime and is used for patient  
73 identification in all health care registers in Finland.

74 We established a dataset comprising virtually the entire Finnish population by linking data from  
75 multiple population-based and nationwide registers. This COVID-19 dataset included all individuals  
76 with a positive PCR test for SARS-CoV-2 identified between 1 January 2020 and 24 February 2021,  
77 based on the Finnish National Infectious Diseases Register. The SARS-CoV-2 cases were linked to  
78 other registers in order to identify severe outcomes. Three severe COVID-19 outcomes were  
79 defined as inpatient hospitalisation (Care Register for Health Care), admission to intensive care  
80 unit (ICU; the Finnish Intensive Care Consortium's Database, FICC), and death within 30 days after  
81 the positive PCR test. All cases hospitalised 14 days before or after the positive PCR test with a  
82 diagnosis indicating respiratory infection, were considered as COVID-19 outcomes.

83 Individuals with chronic diseases or medical conditions (from now on comorbidities) known as  
84 general risk factors of infectious diseases or with risk factors for severe COVID-19 from published  
85 studies were identified from the registers using a pre-defined list of diagnoses and codes (Table 1).  
86 The following registers were employed: the Care Register for Health Care, the Register of Primary  
87 Health Care Visits, as well as the Special Reimbursement Register for Medicine Expenses and  
88 Prescription Centre database, both maintained by the Social Insurance Institution of Finland (SII).  
89 The dataset covers for the most part all health care providers in Finland. The dataset was linked to  
90 the Finnish Population Information System in order to identify individuals without any of the  
91 comorbidities potentially predisposing to severe COVID-19 listed in Table 1.

92 Individuals entitled to reimbursement of medicine expenses from 1 January 2020 onwards were  
93 identified from the SII register for Special Reimbursements for Medicine Expenses. In Finland, all  
94 residents entitled to special reimbursement meet a set of specified medical criteria.

95 Individuals using medication predisposing to immunodeficiency or using medication for type 1 or 2  
96 diabetes were identified from the Prescription Centre database maintained by SII. Persons that  
97 had any of the prescribed medications of interest not more than two years prior to testing positive  
98 for SARS-CoV-2 were identified based on the Anatomical Therapeutic Chemical (ATC) codes.

99 We identified individuals who had used health care services due to any of the specified  
100 comorbidities not more than two years (cancer) or five years (all other comorbidities) prior to the  
101 positive PCR test. Individuals who had used secondary health care services due the specified  
102 comorbidities from the Care Register for Health Care with the International Classification of  
103 Diseases 10th revision (ICD-10) codes and the Nordic Classification of Surgical Procedures (NCSP)  
104 codes. Individuals who had used primary health care services were identified from the Register of

105 Primary Health Care Visits with ICD-10 codes and the International Classification of Primary Care  
106 Second edition (ICPC-2) codes.

### 107 *Statistical analysis*

108 We estimate the incidence of SARS-CoV-2 infection and severe COVID-19 outcomes by age, sex  
109 and comorbidity in individuals with a SARS-CoV-2 infection and in the Finnish population as a  
110 whole. The three severe outcomes were hospitalisation, admission to ICU, and death. We first  
111 estimated age-specific odds ratios (ORs) for each outcome (e.g. hospitalisation) in SARS-CoV-2  
112 cases using logistic regression and adjusting for sex. We next estimated odds ratios, comparing  
113 the odds of the outcome (e.g. hospitalisation) in SARS-CoV-2 cases with and without each of the  
114 comorbidities, adjusting for age and sex. In addition, negative binomial regression was used to  
115 estimate rate ratios (RR) for SARS-CoV-2 infection and the three severe outcomes, comparing  
116 individuals with each of the comorbidities with individuals without any of the listed comorbidities  
117 (Table 1). The negative binomial model was used instead of Poisson regression to account for  
118 overdispersion in the rates. The analysis was adjusted for age and sex.

## 119 **Results**

### 120 *Characteristics of the study population*

121 In Finland, a total of 52 502 SARS-CoV-2 cases occurred from 1 March 2020 through 24 February  
122 2021, 2743 (5.2%) of which were hospitalised, 538 (1.0%) were admitted to ICU, and 801 (1.5%)  
123 died within 30 days after the positive PCR-test (Table 2). The corresponding incidence rates per  
124 100 000 person-years were 822.4 for SARS-CoV-2 cases, 43 for hospitalised cases, 8.4 for ICU cases  
125 and 12.5 for fatal cases. When restricting to 20–69-year-olds, there were 38 728 SARS-CoV-2

126 cases, 1 916 (4.9%) of which were hospitalised, 403 (1.0%) were admitted to ICU and 98 (0.3%)  
127 died within 30 days after the positive PCR-test.

128 The proportion of fatalities among SARS-CoV-2 cases increased with age (Figure 1). In those aged  
129 60–69 years, all fatal cases but one had at least one predisposing factor for severe COVID-19. By  
130 contrast, in those aged  $\geq 70$  fatalities occurred also in individuals without any predisposing factors.  
131 In 20–69-year-olds, 28% of SARS-CoV-2 cases, 64% of hospitalised cases, 72% of ICU cases, and  
132 87% of fatal cases had at least one predisposing factor.

133 The proportion of fatalities among SARS-CoV-2 cases increased with the number of comorbidities  
134 (Figure 1). In all age groups, the more comorbidities there were, the higher the mortality was  
135 among the infected. With three or more comorbidities the proportion of fatal cases varied from  
136 4% (65–69 years) to 32% (75–89 years). In the oldest the proportion of fatal cases was even  
137 higher, irrespective of the number of comorbidities.

138 During the study period, SARS-CoV-2 infections were most frequent among 20–29-year-olds,  
139 hospitalised cases among 50–59-year-olds, ICU cases among 60–69-year-olds, and fatal cases  
140 among 80–89-year-olds (Table 2). The age-specific incidence rates per 100 000 person-years  
141 peaked for SARS-CoV-2 infections in those aged 20–29 (1475), for hospitalised cases in those aged  
142 80–89 (79.6), for ICU cases in those aged 60–69 (17.6) and for fatal cases in those aged  $\geq 90$  (289.1)  
143 (Figure 2). Severe COVID-19 outcomes were thus clearly over-represented among the elderly. Only  
144 6% (3390/52502) of all SARS-CoV-2 cases were detected in individuals aged  $\geq 70$  (Table 2). Yet 28%  
145 (766/2 743) of hospitalised cases, 25% (132/538) of ICU cases and 88% (702/801) of the fatal cases  
146 occurred in this age group.

147 *Predictors of hospitalisation, ICU admission and death*

148 According to the logistic regression analysis, the risk of severe COVID-19 outcomes in an individual  
149 infected with SARS-CoV-2 increased with age. Compared to 60–69-year-olds, the odds ratio (OR) of  
150 death, adjusted for sex, was 7.1 (95% CI 5.3, 9.7) for the 70–79-year-olds, 26.7 (95% CI 20, 36) for  
151 the 80–89-year-olds, and 55.8 (95% CI 40.5, 77.9) for the ≥90-year-olds (Table 3a). Furthermore,  
152 the OR of hospitalisation was 2.0 (95% 1.8, 2.3) and of ICU admission 1.7 (95% CI 1.3, 2.2) for those  
153 aged 70–79 (Table 3a). In addition, male sex was identified as a risk factor for all severe outcomes:  
154 hospitalisation (OR 1.3; 95% CI 1.2, 1.4), ICU admission (OR 1.9; 95% CI 1.6, 2.3), and death (OR  
155 1.9; 95% CI 1.6, 2.2).

156 The more comorbidities a person had, the higher was their risk of severe COVID-19. The effect was  
157 even stronger when the analysis was restricted to 20–69-year-olds (Table 3b). Comparing SARS-  
158 CoV-2 cases with three or more comorbidities with cases without any of the comorbidities in  
159 question, the age- and sex-adjusted ORs of severe outcomes were 6.6 for hospitalisation (95% CI  
160 5.6, 7.7), 9.5 for ICU admission (95% CI 7.0, 12.9), and 16.1 for death (95% CI 8.1, 33.4).

161 Many of the individual comorbidities were clear risk factors for death. Among the 20–69-year-olds  
162 the strongest risk factors for death due to COVID-19 were severe chronic renal disease (OR 9.4;  
163 95% CI 4.2, 18.8), malignant neoplasms (OR 5.8; 95% CI 3.3, 9.7), hematologic malignancy (OR 5.6;  
164 95% CI 1.6, 14.1), chronic pulmonary disease (OR 5.4; 95% CI 2.0, 11.9), and cerebral palsy and  
165 other paralytic syndromes (OR 4.6; 95% CI 0.3, 22.6), when comparing the odds between  
166 individuals with and without the comorbidity in question (Table 3b). Likewise, cerebrovascular  
167 diseases, type 2 diabetes, autoimmune diseases treated with immunosuppressive drugs, use of  
168 glucocorticoids, secondary hypertension alone, ischaemic heart diseases and asthma increased the



169 risk of death, with ORs between 2 and 5. Some of the comorbidities were very rare, thus, it was  
170 not possible to calculate reliable OR estimates.

171 Strong risk factors for COVID-19 hospitalisation among the 20–69-year-olds were severe disorders  
172 of the immune system (OR 8.0; 95% CI 3.5, 17.2), organ or stem cell transplant (OR 7.2; 95% CI 4.0,  
173 12.5), chronic renal disease (OR 6.7; 95% CI 4.6, 9.6), diseases of myoneural junction and muscle  
174 (OR 5.5; 95% CI 2.9, 10.2) (Table 3b). Likewise, psychotic disorders, chronic pulmonary disease,  
175 paralytic syndromes, asthma, hematologic malignancy, type 2 diabetes, cerebrovascular diseases,  
176 cardiovascular diseases, autoimmune diseases treated with immunosuppressive drugs, sleep  
177 apnea, and the use of clozapine, immunosuppressants or biologic drugs increased the risk of  
178 hospitalisation, with ORs between 2 and 5. The severity of the comorbidity was associated with  
179 severe disease outcomes. The risk of hospitalisation and admission to ICU was higher for asthma  
180 and type 2 diabetes cases that had been treated in secondary health care (Figure 3).

181 According to the negative binomial regression model, the population-based rate of SARS-CoV-2  
182 infection decreased with age. Compared to the 60–69-year-olds, the rate was 3.0-times higher in  
183 20–29-year-olds (RR 3.0; 95% CI 2.8, 3.3) and 2.4-times higher in 30–39-year-olds (RR 2.4; 95% CI  
184 2.2, 2.5), but somewhat lower in 70–79-year-olds (RR 0.7; 95% CI 0.6, 0.7) and 80–89-year-olds (RR  
185 0.9; 95% CI 0.9, 1). The higher rate of SARS-CoV-2 infection in the ≥90-year-olds (RR 1.5; 95% CI  
186 1.4, 1.7) can be explained by local epidemics which occurred in nursing homes. However, the rate  
187 of SARS-CoV-2 infection did not differ between females and males. Compared to the 60–69-year-  
188 olds, the population-based rate of hospitalisation was higher among the 50–59-year-olds (RR 1.3;  
189 95% CI 1.2, 1.4) and the risk of ICU admission was higher among the 50–59-year-olds (RR 1.2; 95%  
190 CI 1.0, 1.4).

191 In addition, for each comorbidity, we report the relative rates of hospitalisation, ICU admission  
192 and death in the 20–69-year-olds, comparing individuals with the comorbidity with those without  
193 any of the specified comorbidities (Table 4). The rate of SARS-CoV-2 infection was roughly the  
194 same for most of the comorbidities when comparing to those without any of the specified  
195 comorbidities (Table 4). However, some differences were obvious, e.g. those using clozapine (RR  
196 0.5; 95% CI 0.4, 0.7), with psychotic disorders (RR 0.6; 95% CI 0.5, 0.7) and heart failure, (RR 0.7;  
197 95% CI 0.6, 0.9) had lower rates of SARS-CoV-2 infection. By contrast, the relative rate of severe  
198 COVID-19 outcomes in the 20–69-year-olds, when comparing to those without any of the specified  
199 comorbidities varied, e.g. For hospitalisation it was 5.1–8.9-times higher for organ or stem cell  
200 transplant, severe chronic renal disease, severe disorders of the immune system, diseases of  
201 myoneural junction and muscle and type 2 diabetes.

202 At the upper part of Table 4, 60–69-year-olds is the reference category, and the rate ratios  
203 presented for each comorbidity and outcome at the bottom part of the table can be taken to  
204 present relative rates in that age group. The additional risk caused by a specific comorbidity at any  
205 other age category can be obtained by multiplying the rate ratio of interest at a lower part of the  
206 table by the rate ratio of the age group of interest. For almost all comorbidities, the relative risks  
207 of dying for 50–59-year-olds with comorbidities, were greater than for 60–69-year-olds without  
208 any comorbidities. For example, the risk for 55-year-old person with chronic pulmonary disease to  
209 die of COVID-19 is almost 10 times ( $0.5 \times 19.5$ ) of that of 65-year-old person without any of the  
210 listed conditions.

## 211 **Discussion**

212 In this population-based setting we estimated the risks for four entities: SARS-CoV-2 infection and  
213 COVID-19 related hospitalisation, ICU admission and death by age and various comorbidities or  
214 conditions. Age and certain comorbidities were found to be predictors of severe COVID-19 in cases  
215 of SARS-CoV2 infection. Old age was strongly associated with mortality, and having multiple  
216 comorbidities was associated with both mortality and hospitalisation. The estimation of  
217 population-based rates of hospitalisation and death related to SARS-CoV-2 infection allowed an  
218 even more detailed characterisation of the relative roles of age and comorbidities as risk factors  
219 for severe COVID-19. Based on this analysis, vaccination of the elderly aged  $\geq 70$  years was  
220 prioritised in Finland, followed by vaccination of those with highly predisposing medical  
221 conditions.[16]

222 As expected, immunosuppressive states such as organ or stem cell transplantation, severe  
223 disorders of the immune system or severe renal disease were associated with increased risks of  
224 hospitalisation and ICU admission due to COVID-19. Similar results were obtained in a population-  
225 based Danish study where organ transplantation and severe kidney disease were the two medical  
226 conditions associated with the highest risks of severe COVID-19.[7] In an English study, which  
227 recorded nearly 11 000 deaths in a cohort of more than 17 million SARS-CoV-2 positive patients,  
228 organ transplantation was associated with the highest risk of death due to COVID-19 (hazard ratio  
229 6.0; 95% CI 4.7, 7.6) among the studied medical conditions, after the analysis was adjusted for age  
230 and sex.[11] Furthermore, in our study patients with an autoimmune disease, those receiving  
231 immunosuppressive drug therapy were more prone to severe outcomes than patients without  
232 such therapy. Potential reasons for the increased risk are the immunosuppressive medication itself

233 and the increased severity of the underlying disease that necessitated an immunosuppressive drug  
234 therapy.

235 Among SARS-CoV-2 cases aged 20-69, the relative risk of death was higher in patients with chronic  
236 renal or liver disease, diseases of myoneural junction and muscle, cerebral palsy or other paralytic  
237 syndromes as well as in those with psychotic disorders, especially with prescription for the  
238 psychiatric medication clozapine. The association of psychiatric disorders and high COVID-19  
239 mortality has been explained only partly by the presence of other comorbidities. [17] Other  
240 reasons such as socioeconomic factors, delays in treatment seeking and certain deficits in cellular  
241 immunity in schizophrenia have been implicated.[17] Although it is known that clozapine causes  
242 neutropenia and predisposes for pneumonia[18] its role in COVID-19 infections has not been asessed  
243 broadly.

244 In our analysis, asthma, similarly to other chronic pulmonary diseases, was associated with higher  
245 risk of hospitalisation and intensive care treatment, but it was not associated with higher  
246 mortality. The association with hospitalisation was weaker but present even when asthma had  
247 been treated in primary health care only, indicating a presumably less severe manifestation.

248 However, in a review and meta-analysis where 76 studies and more than 17 million SARS-CoV-2  
249 positive patients were included, asthma was not associated with severe COVID-19.[19] In our  
250 study, 4.7% of 20–69-year-old SARS-CoV-2 cases were recognized as having asthma although the  
251 overall prevalence in Finland is twice as high.[16] Our estimate is likely to represent the risk for  
252 more severe asthma. In line with that, recent treatment of asthma with corticosteroids, indicating  
253 a more severe manifestation, has been reported to be associated with an increased risk of severe  
254 COVID-19 in some studies.[7,11]

255 Although they are no typical predictors for other infectious diseases, it has been widely noted that  
256 metabolic syndrome and obesity as well as type 2 diabetes are strongly associated with higher  
257 risks of severe COVID-19.[11,12,14,20] In our study, type 2 diabetes, which often occurs together  
258 with obesity and metabolic syndrome, was associated with higher risks of severe COVID-19 and  
259 death than the more serious disease, type 1 diabetes. In addition to obesity, regulation of blood  
260 glucose levels might play a role in the progression of SARS-CoV-2 infections among type 2 diabetes  
261 patients as high blood sugar levels have been shown to predict severe COVID-19.[11,20,21]  
262 Moreover, type 2 diabetes has been identified as an prognostic factor for survival among COVID-  
263 19 cases requiring critical care especially among the middle-aged and younger.[14]

264 In many studies, hypertension has been more prevalent among severe or fatal COVID-19 cases  
265 than among milder cases.[22] Also in our study, hypertension was more prevalent among severe  
266 cases; while only 7% of the SARS-CoV-2 positive 20-69-year-old individuals were hypertensive,  
267 25%, 32% and 36% of the hospitalised, ICU and fatal 20-69-year-old cases suffered from  
268 hypertension. However, patients who had only hypertension were not at increased risk of severe  
269 outcomes according to our study; similar results have been obtained elsewhere.[23] Since  
270 hypertension is common in patients who also have other comorbidities predisposing for severe  
271 COVID-19, such as obesity, hypertension alone is not an appropriate indicator for the prioritisation  
272 of COVID-19 vaccination.

273 The main strength of our study is the utilisation of multiple national registers, across which  
274 individual-level data were linked via a unique personal identifier. Information on possible  
275 predisposing comorbidities could therefore be verified from different sources. Furthermore, not  
276 only the conditional risk of hospitalisation given SARS-CoV-2 infection but also the rate of SARS-

277 CoV2 infection could be evaluated based on our nationwide dataset. It is a strength of our study  
278 that the effect of comorbidities on the risk on severe COVID-19 was analysed among the 20-69-  
279 year-olds, excluding the elderly, which should be prioritised by their age in any case.

280 Our study is solely based on register data. Therefore, we could not address the severity of the  
281 underlying comorbidities to any further extent than what could be deduced from the recorded  
282 diagnoses and medications. Another weakness is the rather limited number of cases, although we  
283 included all laboratory-confirmed SARS-CoV-2 cases that had occurred by 24 February 2021.

284 During the study period, non-pharmaceutical interventions reduced the spread of COVID-19 in  
285 Finland considerably. Additionally, not all national registers are adequate for real-time use. For  
286 example, the Finnish Cancer Register is updated only annually, so that, at the time of the study,  
287 data from 2019 and beyond were not yet available. Therefore, we could not utilise more detailed  
288 data from the Cancer register on the status or treatment of cancers and, therefore, could not  
289 identify cases receiving immunosuppressive treatments. Furthermore, the national registers used  
290 to identify individuals with the specified comorbidities did not contain private or occupational  
291 health care visits. However, if any disease entitling a special reimbursement is diagnosed at those  
292 visits, it is registered in the SII and thus included in our dataset.

293 When vaccinations are targeted to prevent severe COVID-19 among those with very common  
294 comorbidities, the number of vaccine doses needed is reasonably high. However, if we assume  
295 that vaccination prevents all severe cases (e. g. hospitalisations) and that the whole population,  
296 without vaccinations, would eventually acquire SARS-CoV-2 infection, the number needed to  
297 vaccinate to prevent one COVID-19 hospitalisation would remain small even for common diseases:

298 only 4.8 (1293 infections / 271 hospitalisations; Table 2) for type 2 diabetes, 6.1 for sleep apnea  
299 and 7.3 for asthma.

300 According to our study, vaccination of the more critically ill, for example, patients with heart  
301 failure or type 1 diabetes, is in fact slightly less effective in preventing severe COVID-19: the risks  
302 of hospitalisation, intensive care treatment and death, conditional on SARS-CoV-2 infection, are  
303 lower than among type 2 diabetes patients. Furthermore, in Finland patients with heart failure  
304 and type 1 diabetes were less likely to have a SARS-CoV-2 infection than patients with type 2  
305 diabetes or asthma. These findings may follow from effective shielding of the most vulnerable,  
306 i.e., strict adherence to the nonpharmaceutical interventions recommended. If in the future we  
307 are in a similar situation again (new pathogen, vaccine scarcity), this kind of study is the key.

#### 308 **Authors' contributions**

309 HS, TL (Tuija), TL (Toni) conceptualized the study. TL (Toni) and UB conducted the statistical  
310 analysis. TL (Tuija) reviewed the literature. HS, TL (Tuija) and KA drafted the manuscript. All  
311 authors discussed the results and contributed to the final manuscript.

#### 312 **Conflicts of interest**

313 All authors declare no conflict of interest

314

315

## 316 **References**

- 317 [1] CDC COVID-19 Response Team. Preliminary Estimates of the Prevalence of Selected Underlying  
318 Health Conditions Among Patients with Coronavirus Disease 2019 - United States, February 12-  
319 March 28, 2020. *MMWR Morb Mortal Wkly Rep* 2020;69(13):382-6.
- 320 [2] CDC COVID-19 Response Team. Severe Outcomes Among Patients with Coronavirus Disease  
321 2019 (COVID-19) - United States, February 12-March 16, 2020. *MMWR Morb Mortal Wkly Rep*  
322 2020;69(12):343-6.
- 323 [3] Guan WJ, Ni ZY, Hu Y, Liang WH, Ou CQ, He JX et al. Clinical Characteristics of Coronavirus  
324 Disease 2019 in China. *N Engl J Med* 2020;382(18):1708-20.
- 325 [4] Guan WJ, Liang WH, Zhao Y, Liang HR, Chen ZS, Li YM et al. Comorbidity and its impact on 1590  
326 patients with COVID-19 in China: a nationwide analysis. *Eur Respir J*  
327 2020;55(5):10.1183/13993003.00547,2020. Print 2020 May.
- 328 [5] WHO. COVID-19 and NCD risk factors. ;2021(July 1,).
- 329 [6] European Centre for Disease Prevention and Control. Risk factors and risk groups. ;2021(July  
330 1,).
- 331 [7] Reilev M, Kristensen KB, Pottegard A, Lund LC, Hallas J, Ernst MT et al. Characteristics and  
332 predictors of hospitalization and death in the first 11 122 cases with a positive RT-PCR test for  
333 SARS-CoV-2 in Denmark: a nationwide cohort. *Int J Epidemiol* 2020;49(5):1468-81.
- 334 [8] Petrilli CM, Jones SA, Yang J, Rajagopalan H, O'Donnell L, Chernyak Y et al. Factors associated  
335 with hospital admission and critical illness among 5279 people with coronavirus disease 2019 in  
336 New York City: prospective cohort study. *BMJ* 2020;369:m1966.
- 337 [9] Richardson S, Hirsch JS, Narasimhan M, Crawford JM, McGinn T, Davidson KW et al. Presenting  
338 Characteristics, Comorbidities, and Outcomes Among 5700 Patients Hospitalized With COVID-19 in  
339 the New York City Area. *JAMA* 2020;323(20):2052-9.
- 340 [10] Kim L, Garg S, O'Halloran A, Whitaker M, Pham H, Anderson EJ et al. Risk Factors for Intensive  
341 Care Unit Admission and In-hospital Mortality Among Hospitalized Adults Identified through the  
342 US Coronavirus Disease 2019 (COVID-19)-Associated Hospitalization Surveillance Network (COVID-  
343 NET). *Clin Infect Dis* 2021;72(9):e206-14.
- 344 [11] Williamson EJ, Walker AJ, Bhaskaran K, Bacon S, Bates C, Morton CE et al. Factors associated  
345 with COVID-19-related death using OpenSAFELY. *Nature* 2020;584(7821):430-6.
- 346 [12] Docherty AB, Harrison EM, Green CA, Hardwick HE, Pius R, Norman L et al. Features of 20 133  
347 UK patients in hospital with covid-19 using the ISARIC WHO Clinical Characterisation Protocol:  
348 prospective observational cohort study. *BMJ* 2020;369:m1985.



- 349 [13] Goodall JW, Reed TAN, Ardissino M, Bassett P, Whittington AM, Cohen DL et al. Risk factors  
350 for severe disease in patients admitted with COVID-19 to a hospital in London, England: a  
351 retrospective cohort study. *Epidemiol Infect* 2020;148:e251.
- 352 [14] Dennis JM, Mateen BA, Sonabend R, Thomas NJ, Patel KA, Hattersley AT et al. Type 2 Diabetes  
353 and COVID-19-Related Mortality in the Critical Care Setting: A National Cohort Study in England,  
354 March-July 2020. *Diabetes Care* 2021;44(1):50-7.
- 355 [15] Bubar KM, Reinholt K, Kissler SM, Lipsitch M, Cobey S, Grad YH et al. Model-informed COVID-  
356 19 vaccine prioritization strategies by age and serostatus. *Science* 2021;371(6532):916-21.
- 357 [16] Finnish Institute for Health and Welfare. Vaccination order and at-risk groups for COVID-19. .  
358 ;2021(July 1,).
- 359 [17] Nemani K, Li C, Olfson M, Blessing EM, Razavian N, Chen J et al. Association of Psychiatric  
360 Disorders With Mortality Among Patients With COVID-19. *JAMA Psychiatry* 2021;78(4):380-6.
- 361 [18] de Leon J, Ruan CJ, Verdoux H, Wang C. Clozapine is strongly associated with the risk of  
362 pneumonia and inflammation. *Gen Psychiatr* 2020;33(2):e100183,100183. eCollection 2020.
- 363 [19] Booth A, Reed AB, Ponzo S, Yassaee A, Aral M, Plans D et al. Population risk factors for severe  
364 disease and mortality in COVID-19: A global systematic review and meta-analysis. *PLoS One*  
365 2021;16(3):e0247461.
- 366 [20] Stefan N, Birkenfeld AL, Schulze MB. Global pandemics interconnected - obesity, impaired  
367 metabolic health and COVID-19. *Nat Rev Endocrinol* 2021;17(3):135-49.
- 368 [21] Hamer M, Gale CR, Batty GD. Diabetes, glycaemic control, and risk of COVID-19  
369 hospitalisation: Population-based, prospective cohort study. *Metabolism* 2020;112:154344.
- 370 [22] Gold MS, Sehayek D, Gabrielli S, Zhang X, McCusker C, Ben-Shoshan M. COVID-19 and  
371 comorbidities: a systematic review and meta-analysis. *Postgrad Med* 2020;132(8):749-55.
- 372 [23] Clark CE, McDonagh STJ, McManus RJ, Martin U. COVID-19 and hypertension: risks and  
373 management. A scientific statement on behalf of the British and Irish Hypertension Society. *J Hum*  
374 *Hypertens* 2021;35(4):304-7.

375

376

377

378

379 Table 1. Comorbidities identified as potential risk factors predisposing to severe COVID-19

| Comorbidities                                                                              | Classification system | Codes                                                                                                                                 | Register |
|--------------------------------------------------------------------------------------------|-----------------------|---------------------------------------------------------------------------------------------------------------------------------------|----------|
| Organ or stem cell transplant                                                              | ICD-10                | T86, Z94                                                                                                                              | 1,2      |
| Malignant neoplasms                                                                        | ICD-10                | C00–C43, C45–C80, C97, D05.1, D39                                                                                                     | 1,2      |
| Hematologic malignancy                                                                     | ICD-10                | C81–C85, C88, C90–C96                                                                                                                 | 1,2      |
| Severe disorders of the immune system                                                      | ICD-10                | D70.8, D80–D84, E31.00                                                                                                                | 2        |
| Severe chronic renal disease                                                               | ICD-10                | I12, I13, N00–N05, N07, N08, N11, N14, N18, N19, E10.2, E11.2, E14.2                                                                  | 1,2      |
| Severe chronic liver disease                                                               | ICD-10                | K70.2, K70.3, K70.4, K71–K74                                                                                                          | 2        |
| Asthma                                                                                     | ICD-10                | J45, J46                                                                                                                              | 2, 3     |
|                                                                                            | ICPC-2                | R96                                                                                                                                   | 3        |
| Chronic pulmonary disease                                                                  | ICD-10                | J41–J44, J47                                                                                                                          | 2        |
| Essential (Primary) Hypertension                                                           | ICD-10                | I10                                                                                                                                   | 1, 3     |
|                                                                                            | ICPC-2                | K86                                                                                                                                   | 3        |
| Hypertensive heart and/or renal disease, secondary hypertension                            | ICD-10                | I11.9, I12, I13.1, I13.9, I15                                                                                                         | 1,2      |
| Ischaemic heart diseases                                                                   | ICD-10                | I20–I25                                                                                                                               | 1,2      |
| Heart failure                                                                              | ICD-10                | I11.0, I13.0, I13.2, I50                                                                                                              | 1,2      |
| Type 1 diabetes                                                                            | ICD-10                | E10                                                                                                                                   | 2, 3     |
|                                                                                            | ICPC-2                | T89                                                                                                                                   | 3        |
|                                                                                            | ATC                   | A10A                                                                                                                                  | 4        |
| Type 2 diabetes                                                                            | ICD-10                | E11, E13, E14                                                                                                                         | 2,3      |
|                                                                                            | ICPC-2                | T90                                                                                                                                   | 3        |
|                                                                                            | ATC                   | A10B                                                                                                                                  | 4        |
| Diseases of myoneural junction and muscle                                                  | ICD10                 | G70–G73                                                                                                                               | 2        |
| Cerebral palsy and other paralytic syndromes                                               | ICD10                 | G80–G83                                                                                                                               | 2        |
| Cerebrovascular diseases                                                                   | ICD-10                | I60–I69                                                                                                                               | 2        |
| Sleep apnea                                                                                | ICD-10                | G47.3                                                                                                                                 | 2, 3     |
| Continuous positive airway pressure therapy                                                | NCSP                  | WX723, WX780                                                                                                                          | 2        |
| Clozapine (prescription for)                                                               | ATC                   | N05AH02                                                                                                                               | 4        |
| Psychotic disorders                                                                        | ICD-10                | F20–F29                                                                                                                               | 2, 3     |
|                                                                                            | ICPC-2                | P72                                                                                                                                   | 3        |
| Autoimmune disease                                                                         | ICD-10                | D86, K50, K51, L40, M02, M05–M07, M13.9, M45, M46.0, M46.1, M46.9, M94.1                                                              | 1, 2     |
| Glucocorticoids (prescription for)                                                         | ATC                   | H02AB02, H02AB04, H02AB06, H02AB07                                                                                                    | 4        |
| Biologic drugs (entitlement to reimbursement of medical expenses)                          | ATC                   | L04AA24, L04AB01, L04AB02, L04AB04, L04AB05, L04AB06, L04AC03, L04AC05, L04AC07, L04AC10, L04AC12, L04AC13, L04AC14, L04AC16, L04AC18 | 1        |
| Biologic drugs, Tumor necrosis factor alpha (TNF- $\alpha$ ) inhibitors (Prescription for) | ATC                   | L04AB                                                                                                                                 | 4        |
| Biologic drugs, other (prescription for)                                                   | ATC                   | L01XC02, L04AA24, L04AA26, L04AA33, L04AC                                                                                             | 4        |
| Other Immunosuppressant drugs                                                              | ATC                   | L01BA01, L04AA06, L04AA10, L04AA13, L04AA18, L04AA29, L04AA37, L04AD01, L04AD02, L04AX01, L04AX03                                     | 4        |

380 ATC, Anatomical Therapeutic Chemical Classification System; ICD-10, International Statistical Classification  
381 of Diseases and Related Health Problems, tenth revision; ICPC-2, International Classification of Primary  
382 Care, second edition; NCSP, Nordic Nomesco Classification of Surgical Procedures.

383 Registers: 1, Special Reimbursement Register for Medicine Expenses; 2, Care Register for Health Care; 3,  
384 Register of Primary Health Care Visits; 4, Prescription Centre database.

385

386 Table 2. Baseline characteristics of cases of SARS-CoV-2 infection

| <b>Age, years</b>                                                      | <b>SARS-CoV-2<br/>PCR-positive</b><br>n = 52502 (100%) | <b>Hospitalised</b><br>n = 2743 (100%) | <b>Hospitalised,<br/>ICU</b><br>n = 538 (100%) | <b>Fatal cases</b><br>n = 801 (100%) |
|------------------------------------------------------------------------|--------------------------------------------------------|----------------------------------------|------------------------------------------------|--------------------------------------|
| 0–9                                                                    | 3447 (6.6%)                                            | 33 (1.2%)                              | 0 (0%)                                         | <5                                   |
| 10–19                                                                  | 6937 (13.2%)                                           | 28 (1%)                                | <5                                             | 0 (0%)                               |
| 20–29                                                                  | 11168 (21.3%)                                          | 120 (4.4%)                             | 11 (2%)                                        | <5                                   |
| 30–39                                                                  | 9376 (17.9%)                                           | 242 (8.8%)                             | 39 (7.2%)                                      | 6 (0.7%)                             |
| 40–49                                                                  | 7773 (14.8%)                                           | 389 (14.2%)                            | 75 (13.9%)                                     | 7 (0.9%)                             |
| 50–59                                                                  | 6837 (13%)                                             | 627 (22.9%)                            | 134 (24.9%)                                    | 26 (3.2%)                            |
| 60–69                                                                  | 3574 (6.8%)                                            | 538 (19.6%)                            | 144 (26.8%)                                    | 58 (7.2%)                            |
| 70–79                                                                  | 1782 (3.4%)                                            | 470 (17.1%)                            | 115 (21.4%)                                    | 183 (22.8%)                          |
| 80–89                                                                  | 1151 (2.2%)                                            | 245 (8.9%)                             | 17 (3.2%)                                      | 324 (40.4%)                          |
| 90+                                                                    | 457 (0.9%)                                             | 51 (1.9%)                              | 0 (0%)                                         | 195 (24.3%)                          |
| 20–29                                                                  | 38728 (73.8%)                                          | 1916 (69.9%)                           | 403 (74.9%)                                    | 98 (12.2%)                           |
| <b>Total</b>                                                           | <b>52502 (100%)</b>                                    | <b>2743 (100%)</b>                     | <b>538 (100%)</b>                              | <b>801 (100%)</b>                    |
| <b>Sex</b>                                                             |                                                        |                                        |                                                |                                      |
| male                                                                   | 26881 (51.2%)                                          | 1516 (55.3%)                           | 353 (65.6%)                                    | 398 (49.7%)                          |
| female                                                                 | 25621 (48.8%)                                          | 1227 (44.7%)                           | 185 (34.4%)                                    | 403 (50.3%)                          |
| <b>Number of comorbidities, all ages</b>                               |                                                        |                                        |                                                |                                      |
| 0                                                                      | 37407 (71.2%)                                          | 808 (29.5%)                            | 131 (24.3%)                                    | 45 (5.6%)                            |
| 1                                                                      | 9200 (17.5%)                                           | 797 (29.1%)                            | 150 (27.9%)                                    | 166 (20.7%)                          |
| 2                                                                      | 3771 (7.2%)                                            | 594 (21.7%)                            | 139 (25.8%)                                    | 272 (34%)                            |
| 3+                                                                     | 2124 (4%)                                              | 544 (19.8%)                            | 118 (21.9%)                                    | 318 (39.7%)                          |
| <b>Number of comorbidities, 20–69-year-olds</b>                        |                                                        |                                        |                                                |                                      |
| 0                                                                      | 27940 (72.1%)                                          | 696 (36.3%)                            | 112 (27.8%)                                    | 13 (13.3%)                           |
| 1                                                                      | 7236 (18.7%)                                           | 589 (30.7%)                            | 105 (26.1%)                                    | 29 (29.6%)                           |
| 2                                                                      | 2429 (6.3%)                                            | 351 (18.3%)                            | 97 (24.1%)                                     | 29 (29.6%)                           |
| 3+                                                                     | 1123 (2.9%)                                            | 280 (14.6%)                            | 89 (22.1%)                                     | 27 (27.6%)                           |
| <b>Comorbidities, 20–69-year-olds</b>                                  |                                                        |                                        |                                                |                                      |
| Organ or stem cell transplant                                          | 59 (0.2%)                                              | 21 (1.1%)                              | 9 (2.2%)                                       | <5                                   |
| Malignant neoplasms                                                    | 596 (1.5%)                                             | 87 (4.5%)                              | 18 (4.5%)                                      | 18 (18.4%)                           |
| Hematologic malignancy                                                 | 112 (0.3%)                                             | 23 (1.2%)                              | 7 (1.7%)                                       | <5                                   |
| Severe disorders of the immune system                                  | 36 (0.1%)                                              | 10 (0.5%)                              | <5                                             | 0 (0%)                               |
| Severe chronic renal disease                                           | 152 (0.4%)                                             | 53 (2.8%)                              | 17 (4.2%)                                      | 9 (9.2%)                             |
| Severe chronic liver disease                                           | 65 (0.2%)                                              | 9 (0.5%)                               | <5                                             | <5                                   |
| Asthma                                                                 | 1823 (4.7%)                                            | 249 (13%)                              | 77 (19.1%)                                     | 11 (11.2%)                           |
| Chronic pulmonary disease                                              | 122 (0.3%)                                             | 38 (2%)                                | 12 (3%)                                        | 6 (6.1%)                             |
| Primary or secondary hypertension                                      | 2585 (6.7%)                                            | 455 (23.7%)                            | 131 (32.5%)                                    | 35 (35.7%)                           |
| Essential (primary) hypertension alone                                 | 669 (1.7%)                                             | 54 (2.8%)                              | 9 (2.2%)                                       | <5                                   |
| Secondary hypertension (hypertensive heart and/or renal disease) alone | 878 (2.3%)                                             | 170 (8.9%)                             | 63 (15.6%)                                     | 19 (19.4%)                           |
| Ischaemic heart diseases                                               | 498 (1.3%)                                             | 103 (5.4%)                             | 33 (8.2%)                                      | 11 (11.2%)                           |
| Heart failure                                                          | 66 (0.2%)                                              | 12 (0.6%)                              | <5                                             | <5                                   |
| Type 1 diabetes                                                        | 312 (0.8%)                                             | 28 (1.5%)                              | 5 (1.2%)                                       | <5                                   |

|                                                                                            |             |             |            |            |
|--------------------------------------------------------------------------------------------|-------------|-------------|------------|------------|
| Type 2 diabetes                                                                            | 1293 (3.3%) | 271 (14.1%) | 87 (21.6%) | 25 (25.5%) |
| Diseases of myoneural junction and muscle                                                  | 56 (0.1%)   | 16 (0.8%)   | 7 (1.7%)   | <5         |
| Cerebral palsy and other paralytic syndromes                                               | 70 (0.2%)   | 11 (0.6%)   | <5         | <5         |
| Cerebrovascular diseases                                                                   | 247 (0.6%)  | 54 (2.8%)   | 15 (3.7%)  | 8 (8.2%)   |
| Sleep apnea                                                                                | 1403 (3.6%) | 230 (12%)   | 68 (16.9%) | 11 (11.2%) |
| Psychotic disorders                                                                        | 60 (0.2%)   | 11 (0.6%)   | <5         | <5         |
| Clozapine (prescription for)                                                               | 362 (0.9%)  | 54 (2.8%)   | 5 (1.2%)   | 9 (9.2%)   |
| Glucocorticoids (prescription for)                                                         | 2989 (7.7%) | 385 (20.1%) | 84 (20.8%) | 26 (26.5%) |
| Biologic drugs (entitlement to reimbursement of medical expenses)                          | 163 (0.4%)  | 14 (0.7%)   | <5         | 0 (0%)     |
| Biologic drugs, Tumor necrosis factor alpha (TNF- $\alpha$ ) inhibitors (prescription for) | 135 (0.3%)  | 9 (0.5%)    | <5         | 0 (0%)     |
| Biologic drugs, other (prescription for)                                                   | 50 (0.1%)   | 8 (0.4%)    | <5         | 0 (0%)     |
| Other Immunosuppressant drugs                                                              | 486 (1.3%)  | 69 (3.6%)   | 16 (4%)    | <5         |
| Autoimmune disease with immunosuppressive drug therapy                                     | 709 (1.8%)  | 94 (4.9%)   | 18 (4.5%)  | 8 (8.2%)   |
| Autoimmune disease without immunosuppressive drug therapy                                  | 651 (1.7%)  | 51 (2.7%)   | 13 (3.2%)  | <5         |

387

388

389

390

391

392

393

394 Table 3a. Relative risk of severe COVID-19 (hospitalisation, ICU and death) in cases of SARS-Cov-2 infection  
 395 by age group and sex. The reference category is 60–69-year-old females. Relative risks are presented in  
 396 terms of odds ratios (OR) and their 95% confidence intervals (CI 95%).

|        | OR (95% CI)    |                     |                      |                     |                 |                      |
|--------|----------------|---------------------|----------------------|---------------------|-----------------|----------------------|
|        | Hospitalised   |                     | Hospitalised,<br>ICU |                     | Fatal cases     |                      |
|        | Crude          | Adjusted for<br>sex | Crude                | Adjusted for<br>sex | Crude           | Adjusted for<br>sex  |
| Age,   |                |                     |                      |                     |                 |                      |
| years  |                |                     |                      |                     |                 |                      |
| 0–9    | 0.1 (0, 0.1)   | 0.1 (0, 0.1)        | 0 (0, 0)             | 0 (0, 0)            | 0 (0, 0.1)      | 0 (0, 0.1)           |
| 10–19  | 0 (0, 0)       | 0 (0, 0)            | 0 (0, 0)             | 0 (0, 0)            | 0 (0, 0)        | 0 (0, 0)             |
| 20–29  | 0.1 (0, 0.1)   | 0.1 (0, 0.1)        | 0 (0, 0)             | 0 (0, 0)            | 0 (0, 0)        | 0 (0, 0)             |
| 30–39  | 0.1 (0.1, 0.2) | 0.1 (0.1, 0.2)      | 0.1 (0.1, 0.1)       | 0.1 (0.1, 0.1)      | 0 (0, 0.1)      | 0 (0, 0.1)           |
| 40–49  | 0.3 (0.3, 0.3) | 0.3 (0.3, 0.3)      | 0.2 (0.2, 0.3)       | 0.2 (0.2, 0.3)      | 0.1 (0, 0.1)    | 0.1 (0, 0.1)         |
| 50–59  | 0.6 (0.5, 0.6) | 0.6 (0.5, 0.6)      | 0.5 (0.4, 0.6)       | 0.5 (0.4, 0.6)      | 0.2 (0.1, 0.4)  | 0.2 (0.1, 0.4)       |
| 60–69  | 1.0 (ref)      | 1.0 (ref)           | 1.0 (ref)            | 1.0 (ref)           | 1.0 (ref)       | 1.0 (ref)            |
| 70–79  | 2 (1.8, 2.3)   | 2 (1.8, 2.3)        | 1.6 (1.3, 2.1)       | 1.7 (1.3, 2.2)      | 6.9 (5.2, 9.5)  | 7.1 (5.3, 9.7)       |
| 80–89  | 1.5 (1.3, 1.8) | 1.6 (1.3, 1.9)      | 0.4 (0.2, 0.6)       | 0.4 (0.2, 0.6)      | 23.7 (17.9, 32) | 26.7 (20, 36)        |
| 90+    | 0.7 (0.5, 1)   | 0.8 (0.6, 1)        | 0 (0, 0)             | 0 (0, 0)            | 45.1 (33, 62.5) | 55.8 (40.5,<br>77.9) |
| Sex    |                |                     |                      |                     |                 |                      |
| Male   |                | 1.3 (1.2, 1.4)      |                      | 1.9 (1.6, 2.3)      |                 | 1.9 (1.6, 2.2)       |
| Female |                | 1.0 (ref)           |                      | 1.0 (ref)           |                 | 1.0 (ref)            |

397

398 Table 3b. Relative risk of severe COVID-19 (hospitalisation, ICU and death) in cases of SARS-Cov-2 infection by number of comorbidities and by individual  
 399 comorbidities, adjusted for age and sex. Relative risks are presented in terms of odds ratios (OR) and their 95% confidence intervals (CI 95%).

|                                                             | OR (95% CI)       |                          |                   |                          |                    |                          |
|-------------------------------------------------------------|-------------------|--------------------------|-------------------|--------------------------|--------------------|--------------------------|
|                                                             | Hospitalised      |                          | Hospitalised, ICU |                          | Fatal cases        |                          |
|                                                             | Crude             | Adjusted for age and sex | Crude             | Adjusted for age and sex | Crude              | Adjusted for age and sex |
| <b>Number of comorbidities, all ages<sup>1</sup></b>        |                   |                          |                   |                          |                    |                          |
| 1                                                           | 4.3 (3.9, 4.8)    | 2.4 (2.2, 2.7)           | 4.7 (3.7, 6)      | 2.5 (2, 3.2)             | 15.3 (11.1, 21.5)  | 2.6 (1.9, 3.8)           |
| 2                                                           | 8.5 (7.6, 9.5)    | 3.5 (3.1, 4)             | 10.9 (8.6, 13.9)  | 4.5 (3.4, 5.8)           | 64.5 (47.5, 89.8)  | 4.4 (3.1, 6.3)           |
| 3+                                                          | 15.6 (13.8, 17.6) | 5.3 (4.6, 6.1)           | 16.7 (13, 21.5)   | 6.2 (4.6, 8.2)           | 146.2 (107.8, 203) | 6.2 (4.4, 9)             |
| <b>Number of comorbidities, 20–69-year-olds<sup>1</sup></b> |                   |                          |                   |                          |                    |                          |
| 1                                                           | 3.5 (3.1, 3.9)    | 2.5 (2.2, 2.8)           | 3.7 (2.8, 4.8)    | 2.4 (1.8, 3.2)           | 8.6 (4.6, 17.2)    | 4.7 (2.5, 9.6)           |
| 2                                                           | 6.6 (5.8, 7.6)    | 3.8 (3.3, 4.4)           | 10.3 (7.8, 13.6)  | 5.4 (4, 7.2)             | 26 (13.8, 51.7)    | 9.9 (5.1, 20.3)          |
| 3+                                                          | 13 (11.1, 15.2)   | 6.6 (5.6, 7.7)           | 21.4 (16.1, 28.4) | 9.5 (7, 12.9)            | 52.9 (27.8, 106.2) | 16.1 (8.1, 33.4)         |
| <b>Comorbidities, 20–69-year-olds<sup>2</sup></b>           |                   |                          |                   |                          |                    |                          |
| Organ or stem cell transplant                               | 10.7 (6.2, 18.1)  | 7.2 (4, 12.5)            | 17.5 (8, 34.1)    | 9.8 (4.3, 19.8)          | 6.9 (0.4, 31.6)    | 2.8 (0.2, 13.5)          |
| Malignant neoplasms                                         | 3.4 (2.7, 4.3)    | 1.7 (1.4, 2.2)           | 3.1 (1.8, 4.8)    | 1.4 (0.9, 2.3)           | 14.8 (8.6, 24.3)   | 5.8 (3.3, 9.7)           |
| Hematologic malignancy                                      | 5 (3.1, 7.8)      | 2.9 (1.7, 4.6)           | 6.4 (2.7, 12.9)   | 3.1 (1.3, 6.4)           | 15.2 (4.6, 37.1)   | 5.6 (1.6, 14.1)          |

|                                                                        |                  |                 |                  |                 |                   |                 |
|------------------------------------------------------------------------|------------------|-----------------|------------------|-----------------|-------------------|-----------------|
| Severe disorders of the immune system                                  | 7.4 (3.4, 14.9)  | 8 (3.5, 17.2)   | 2.7 (0.2, 12.6)  | 2.5 (0.1, 12.4) | 0 (0, 5211.9)     | 0 (0, 4720.9)   |
| Severe chronic renal disease                                           | 10.5 (7.5, 14.7) | 6.7 (4.6, 9.6)  | 12.5 (7.2, 20.2) | 6.1 (3.5, 10.2) | 27.2 (12.5, 52.2) | 9.4 (4.2, 18.8) |
| Severe chronic liver disease                                           | 3.1 (1.4, 6)     | 1.5 (0.7, 3)    | 4.6 (1.1, 12.5)  | 2.1 (0.5, 5.7)  | 26.9 (8.1, 67)    | 9.8 (2.9, 25.7) |
| Asthma                                                                 | 3.3 (2.9, 3.8)   | 3 (2.5, 3.4)    | 4.9 (3.8, 6.3)   | 4.3 (3.3, 5.6)  | 2.6 (1.3, 4.6)    | 2 (1, 3.7)      |
| Chronic pulmonary disease                                              | 8.8 (6, 12.9)    | 3.7 (2.5, 5.5)  | 10.7 (5.5, 18.7) | 3.8 (1.9, 6.7)  | 21.7 (8.3, 46.5)  | 5.4 (2, 11.9)   |
| Primary or secondary hypertension                                      | 5.1 (4.5, 5.7)   | 2.3 (2.1, 2.7)  | 7 (5.7, 8.7)     | 2.9 (2.3, 3.7)  | 7.9 (5.1, 11.8)   | 2.2 (1.4, 3.4)  |
| Essential (primary) hypertension alone                                 | 1.7 (1.3, 2.2)   | 0.8 (0.6, 1.1)  | 1.3 (0.6, 2.4)   | 0.6 (0.3, 1.1)  | 1.2 (0.2, 3.8)    | 0.5 (0.1, 1.5)  |
| Secondary hypertension (hypertensive heart and/or renal disease) alone | 5 (4.2, 5.9)     | 2.1 (1.7, 2.5)  | 8.5 (6.4, 11.2)  | 3.2 (2.4, 4.3)  | 10.6 (6.2, 17.1)  | 2.7 (1.6, 4.5)  |
| Ischaemic heart diseases                                               | 5.2 (4.2, 6.5)   | 2 (1.6, 2.6)    | 7.3 (4.9, 10.3)  | 2.4 (1.6, 3.4)  | 9.9 (5, 17.9)     | 2.1 (1, 3.9)    |
| Heart failure                                                          | 4.3 (2.2, 7.7)   | 2.3 (1.1, 4.3)  | 3 (0.5, 9.6)     | 1.3 (0.2, 4.1)  | 6.1 (0.3, 28.1)   | 1.8 (0.1, 8.6)  |
| Type 1 diabetes                                                        | 1.9 (1.3, 2.8)   | 1.9 (1.2, 2.8)  | 1.6 (0.6, 3.4)   | 1.4 (0.5, 3.1)  | 1.3 (0.1, 5.7)    | 1 (0.1, 4.8)    |
| Type 2 diabetes                                                        | 5.8 (5, 6.6)     | 2.8 (2.4, 3.3)  | 8.5 (6.6, 10.8)  | 3.7 (2.8, 4.7)  | 10.1 (6.3, 15.7)  | 3.2 (2, 5.1)    |
| Diseases of myoneural junction and muscle                              | 7.7 (4.2, 13.6)  | 5.5 (2.9, 10.2) | 13.8 (5.7, 28.7) | 8.1 (3.2, 17.9) | 14.9 (2.4, 48.7)  | 5.8 (0.9, 20.4) |
| Cerebral palsy and other paralytic syndromes                           | 3.6 (1.8, 6.6)   | 3.3 (1.6, 6.2)  | 5.8 (1.8, 14.1)  | 4.9 (1.4, 12.4) | 5.8 (0.3, 26.4)   | 4.6 (0.3, 22.6) |
| Cerebrovascular diseases                                               | 5.5 (4, 7.4)     | 2.5 (1.8, 3.4)  | 6.3 (3.6, 10.4)  | 2.4 (1.3, 4)    | 14.3 (6.3, 28)    | 3.8 (1.7, 7.6)  |
| Sleep apnea                                                            | 4.1 (3.6, 4.8)   | 2.2 (1.9, 2.6)  | 5.6 (4.3, 7.3)   | 2.7 (2, 3.5)    | 3.4 (1.7, 6.1)    | 1.2 (0.6, 2.2)  |
| Psychotic disorders                                                    | 3.4 (2.5, 4.6)   | 3.4 (2.5, 4.7)  | 1.3 (0.5, 2.9)   | 1.2 (0.4, 2.7)  | 11 (5.1, 20.8)    | 10.2 (4.6, 20)  |
| Clozapine (prescription for)                                           | 4.3 (2.1, 8)     | 4.2 (2, 8)      | 3.3 (0.5, 10.6)  | 2.9 (0.5, 9.7)  | 6.7 (0.4, 31)     | 6.1 (0.3, 30.6) |
| Glucocorticoids (prescription for)                                     | 3.3 (2.9, 3.7)   | 2.6 (2.3, 2.9)  | 3.2 (2.5, 4.1)   | 2.4 (1.8, 3)    | 4.3 (2.7, 6.7)    | 3 (1.9, 4.7)    |
| Biologic drugs (entitlement to reimbursement of medical expenses)      | 1.8 (1, 3)       | 1.7 (0.9, 2.9)  | 0.6 (0, 2.6)     | 0.5 (0, 2.4)    | 0 (0, 0.8)        | 0 (0, 76.3)     |



|                                                                                            |                |                |                |                |                |                |
|--------------------------------------------------------------------------------------------|----------------|----------------|----------------|----------------|----------------|----------------|
| Biologic drugs, Tumor necrosis factor alpha (TNF- $\alpha$ ) inhibitors (prescription for) | 1.4 (0.6, 2.6) | 1.4 (0.6, 2.6) | 0.7 (0, 3.2)   | 0.7 (0, 3.3)   | 0 (0, 2.4)     | 0 (0, 462.3)   |
| Biologic drugs, other (prescription for)                                                   | 3.7 (1.6, 7.4) | 2.9 (1.2, 5.9) | 1.9 (0.1, 8.9) | 1.4 (0.1, 6.5) | 0 (0, 46.4)    | 0 (0, 0)       |
| Other Immunosuppressant drugs                                                              | 3.3 (2.5, 4.2) | 2.5 (1.9, 3.3) | 3.3 (1.9, 5.4) | 2.4 (1.4, 3.9) | 3.4 (1, 8.1)   | 2.2 (0.7, 5.3) |
| Autoimmune disease with immunosuppressive drug therapy                                     | 3 (2.4, 3.8)   | 2.3 (1.8, 2.9) | 2.5 (1.5, 4)   | 1.8 (1.1, 2.8) | 4.8 (2.1, 9.3) | 3.1 (1.4, 6.1) |
| Autoimmune disease without immunosuppressive drug therapy                                  | 1.7 (1.2, 2.2) | 1.2 (0.9, 1.6) | 2 (1.1, 3.3)   | 1.4 (0.8, 2.4) | 0.6 (0, 2.7)   | 0.4 (0, 1.7)   |

400  
401  
402

---

<sup>1</sup> Compared to the individuals without any of the comorbidities in question.  
<sup>2</sup> Comparing the odds of each outcome with and without the comorbidities in question.

403

404

405 Table 4. Relative rates of SARS-Cov-2 infection and severe COVID-19 outcomes (hospitalisation, admission to ICU and death) in the Finnish population aged  
 406 20–29, based on a negative binomial regression model. The table presents rate ratios (RR) and 95% confidence intervals (CI 95%).

|                                                                        | RR (95% CI)                | Hospitalised    | Hospitalised, ICU | Fatal cases        |
|------------------------------------------------------------------------|----------------------------|-----------------|-------------------|--------------------|
|                                                                        | SARS-CoV-2<br>PCR-positive |                 |                   |                    |
| <b>Age, years</b>                                                      |                            |                 |                   |                    |
| 20–29                                                                  | 3.1 (2.9, 3.3)             | 0.4 (0.3, 0.5)  | 0.2 (0.1, 0.3)    | 0.1 (0, 0.3)       |
| 30–39                                                                  | 2.4 (2.3, 2.5)             | 0.8 (0.7, 0.9)  | 0.5 (0.4, 0.7)    | 0.2 (0.1, 0.3)     |
| 40–49                                                                  | 2.3 (2.2, 2.4)             | 1.2 (1, 1.3)    | 0.9 (0.8, 1.2)    | 0.3 (0.2, 0.4)     |
| 50–59                                                                  | 1.8 (1.8, 1.9)             | 1.3 (1.2, 1.5)  | 1.2 (1, 1.4)      | 0.5 (0.4, 0.7)     |
| 60–69                                                                  | 1.0 (ref)                  | 1.0 (ref)       | 1.0 (ref)         | 1.0 (ref)          |
| <b>Sex</b>                                                             |                            |                 |                   |                    |
| Male                                                                   | 1 (1, 1)                   | 1.3 (1.2, 1.4)  | 1.2 (1.1, 1.3)    | 2.1 (1.8, 2.3)     |
| Female                                                                 | 1.0 (ref)                  | 1.0 (ref)       | 1.0 (ref)         | 1.0 (ref)          |
| <b>Comorbidities, 20–69-year-olds<sup>1</sup></b>                      |                            |                 |                   |                    |
| Organ or stem cell transplant                                          | 1 (0.8, 1.3)               | 8.9 (5.5, 13.8) | 20.7 (9.7, 38.6)  | 15.2 (0.8, 76.6)   |
| Malignant neoplasms                                                    | 1 (0.9, 1.1)               | 3.1 (2.3, 4)    | 3.6 (2.1, 5.7)    | 20.7 (10, 43.9)    |
| Hematologic malignancy                                                 | 1 (0.8, 1.2)               | 4.7 (2.9, 7.2)  | 7.6 (3.2, 15.3)   | 25.9 (7.2, 73.9)   |
| Severe disorders of the immune system                                  | 0.9 (0.6, 1.2)             | 7.5 (3.7, 13.5) | 4.7 (0.3, 20.8)   | NA                 |
| Severe chronic renal disease                                           | 1 (0.8, 1.1)               | 8.3 (6, 11.3)   | 14.3 (8.2, 23.2)  | 46.4 (19, 108.7)   |
| Severe chronic liver disease                                           | 0.9 (0.7, 1.1)             | 2.7 (1.3, 4.9)  | 4.8 (1.2, 12.7)   | 38.6 (10.8, 110.3) |
| Asthma                                                                 | 1.1 (1.1, 1.2)             | 4.8 (4, 5.9)    | 9.5 (7.1, 12.7)   | 9.8 (4.3, 22.1)    |
| Chronic pulmonary disease                                              | 0.8 (0.7, 1)               | 4.6 (3.1, 6.6)  | 7.4 (3.9, 13)     | 19.5 (6.8, 50.1)   |
| Primary or secondary hypertension                                      | 0.9 (0.9, 1)               | 3.5 (2.8, 4.2)  | 4.9 (3.8, 6.4)    | 7.5 (4, 15)        |
| Essential (primary) hypertension alone                                 | 1 (0.9, 1.1)               | 1.8 (1.3, 2.4)  | 1.6 (0.8, 3)      | 2.2 (0.4, 8.2)     |
| Secondary hypertension (hypertensive heart and/or renal disease) alone | 0.8 (0.7, 0.9)             | 2.9 (2.3, 3.7)  | 5.6 (4, 7.7)      | 9.1 (4.4, 19.1)    |
| Ischaemic heart diseases                                               | 1 (0.9, 1.1)               | 3.4 (2.6, 4.5)  | 5.2 (3.4, 7.7)    | 8.9 (3.8, 20.2)    |
| Heart failure                                                          | 0.7 (0.6, 0.9)             | 2.8 (1.5, 4.9)  | 2.4 (0.4, 7.4)    | 6.6 (0.4, 33.6)    |

|                                                                                            |                |                |                  |                   |
|--------------------------------------------------------------------------------------------|----------------|----------------|------------------|-------------------|
| Type 1 diabetes                                                                            | 0.8 (0.7, 0.9) | 2.5 (1.6, 3.7) | 2.6 (0.9, 5.8)   | 4.1 (0.2, 20.7)   |
| Type 2 diabetes                                                                            | 1.1 (1.1, 1.2) | 5.1 (4.1, 6.3) | 7.9 (5.9, 10.5)  | 12.8 (6.5, 26.1)  |
| Diseases of myoneural junction and muscle                                                  | 0.9 (0.7, 1.1) | 7 (4, 11.3)    | 17 (7.2, 34)     | 31.5 (4.9, 114.8) |
| Cerebral palsy and other paralytic syndromes                                               | 1 (0.7, 1.2)   | 5 (2.5, 8.7)   | 10.7 (3.3, 25.5) | 19.9 (1.1, 100.2) |
| Cerebrovascular diseases                                                                   | 0.9 (0.8, 1.1) | 4.2 (3, 5.8)   | 6 (3.3, 10)      | 17.9 (7, 43.1)    |
| Sleep apnea                                                                                | 1 (0.9, 1)     | 3.7 (3, 4.6)   | 5.6 (4.1, 7.6)   | 6.1 (2.6, 13.7)   |
| Psychotic disorders                                                                        | 0.6 (0.5, 0.7) | 3.1 (2.2, 4.1) | 1.7 (0.6, 3.7)   | 24.6 (10.2, 57.2) |
| Clozapine (prescription for)                                                               | 0.5 (0.4, 0.7) | 2.9 (1.5, 5)   | 3 (0.5, 9.5)     | 12.7 (0.7, 63.7)  |
| Glucocorticoids (prescription for)                                                         | 1.1 (1, 1.1)   | 3.9 (3.2, 4.7) | 5.1 (3.8, 6.8)   | 11.5 (6, 23.2)    |
| Biologic drugs (entitlement to reimbursement of medical expenses)                          | 0.9 (0.8, 1.1) | 2.4 (1.3, 4)   | 1 (0.1, 4.6)     | NA                |
| Biologic drugs, Tumor necrosis factor alpha (TNF- $\alpha$ ) inhibitors (prescription for) | 0.9 (0.8, 1.1) | 1.9 (0.9, 3.5) | 1.3 (0.1, 5.7)   | NA                |
| Biologic drugs, other (prescription for)                                                   | 1 (0.8, 1.3)   | 4.7 (2.1, 8.9) | 3.4 (0.2, 15)    | NA                |
| Other Immunosuppressant drugs                                                              | 0.8 (0.8, 0.9) | 3.3 (2.4, 4.3) | 4.4 (2.5, 7.3)   | 7.9 (2.2, 22.3)   |
| Autoimmune disease with immunosuppressive drug therapy                                     | 0.9 (0.8, 0.9) | 3.1 (2.4, 4.1) | 3.6 (2.1, 5.7)   | 11.4 (4.5, 27.2)  |
| Autoimmune disease without immunosuppressive drug therapy                                  | 0.9 (0.8, 0.9) | 1.9 (1.4, 2.6) | 2.8 (1.5, 4.8)   | 1.6 (0.1, 8)      |

407  
408

<sup>1</sup>Comparing the rate of each outcome in individuals with the comorbidity in question to those without any of the specified comorbidities

409 Figure 1. Proportion (%) of fatal outcome in cases of SARS-CoV-2 infection by age group and number of  
410 comorbidities.

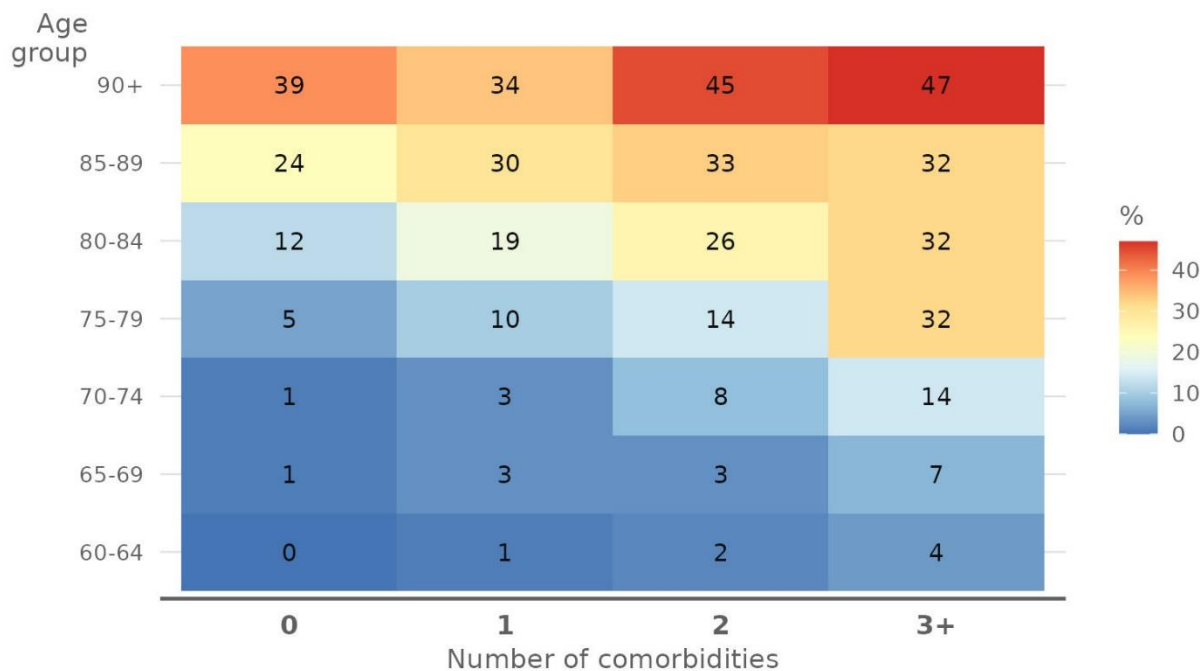

411

412

413

414

415 Figure 2. Incidence (per 100 000 person-years) of the SARS-Cov-2 infection and COVID-19 outcomes by age  
416 group in the Finnish population. SARS-Cov-2 cases on the left side Y axis and the remainder on right side Y  
417 axis.

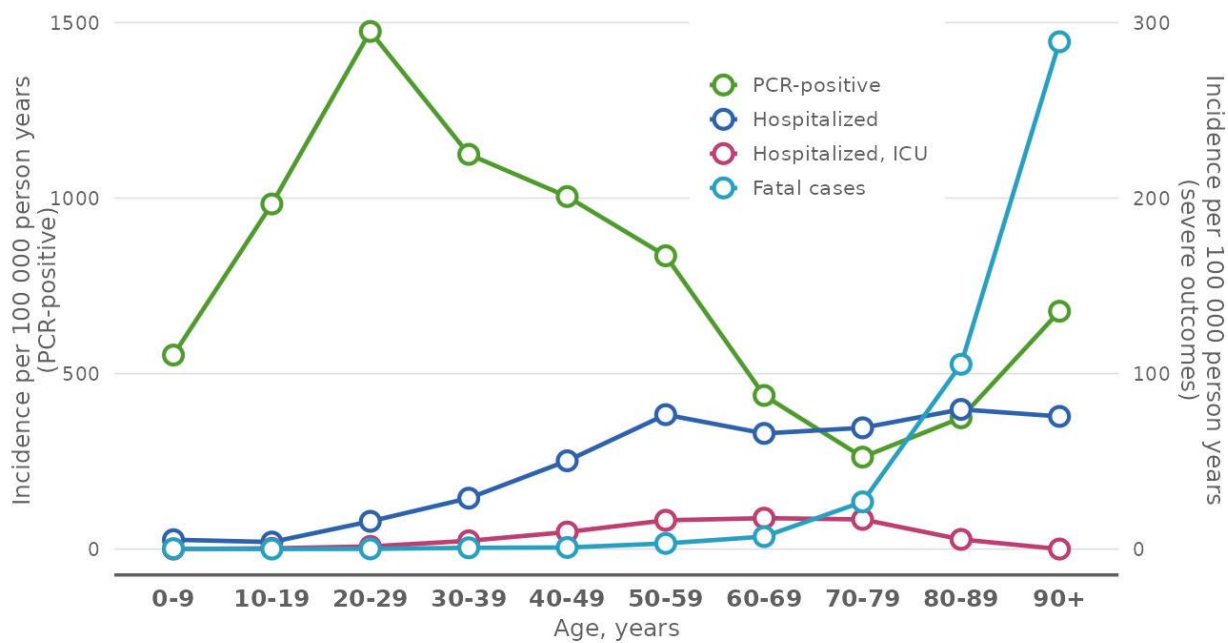

418

419

420

421

422 Figure 3. Predictors of severe COVID-19 (hospitalisation and ICU) in cases of SARS-Cov-2 infection. Odds  
423 ratios (OR) and 95% confidence intervals (CI 95%).

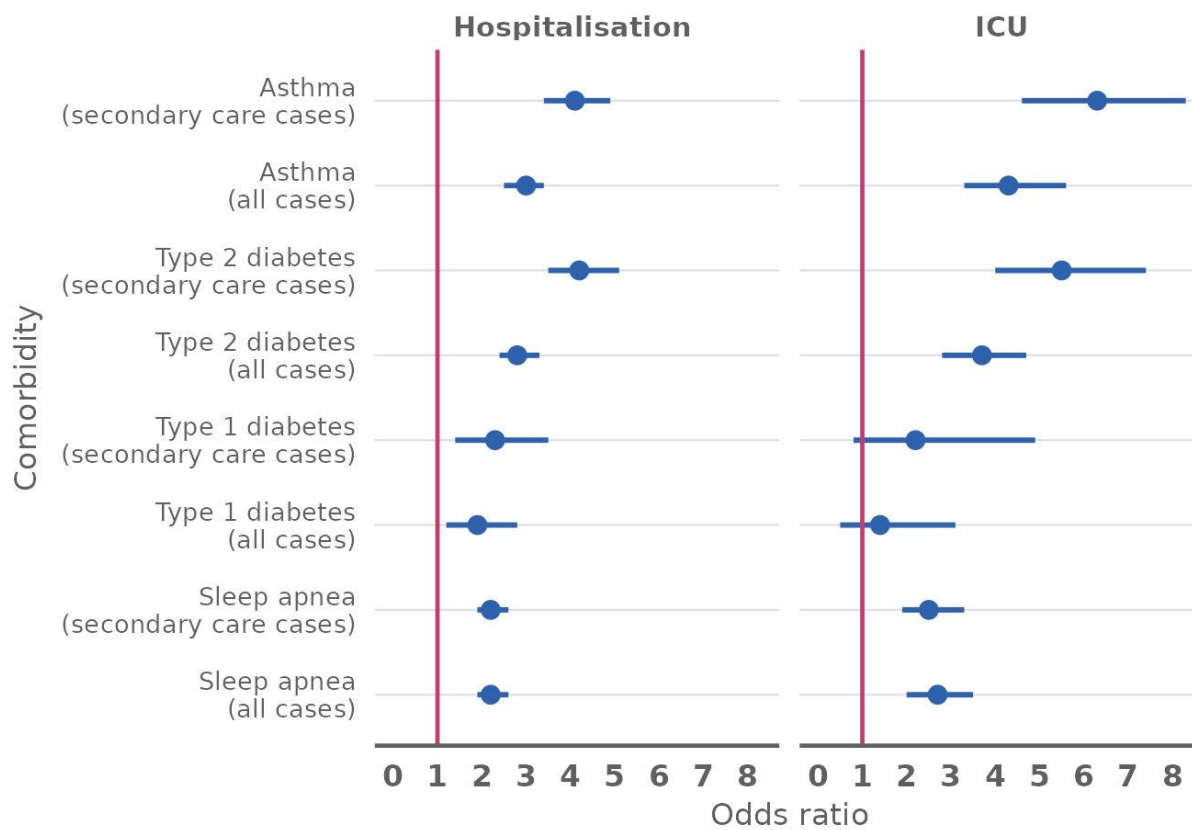

424
